# Supplementary material
Source: Elsevier journal article supplement (https://www.sciencedirect.com/science/article/pii/S0021755722000286)

**JPED-D-21-00273 – Supplementary Material**

**Supplementary Figure 1 - Total monthly expenses paid by the Brazilian public health system (SUS) to hospitals for admissions of children and adolescents (< 16 years) due to respiratory infections in São Paulo State, Brazil, between January 2008 and March 2021.**


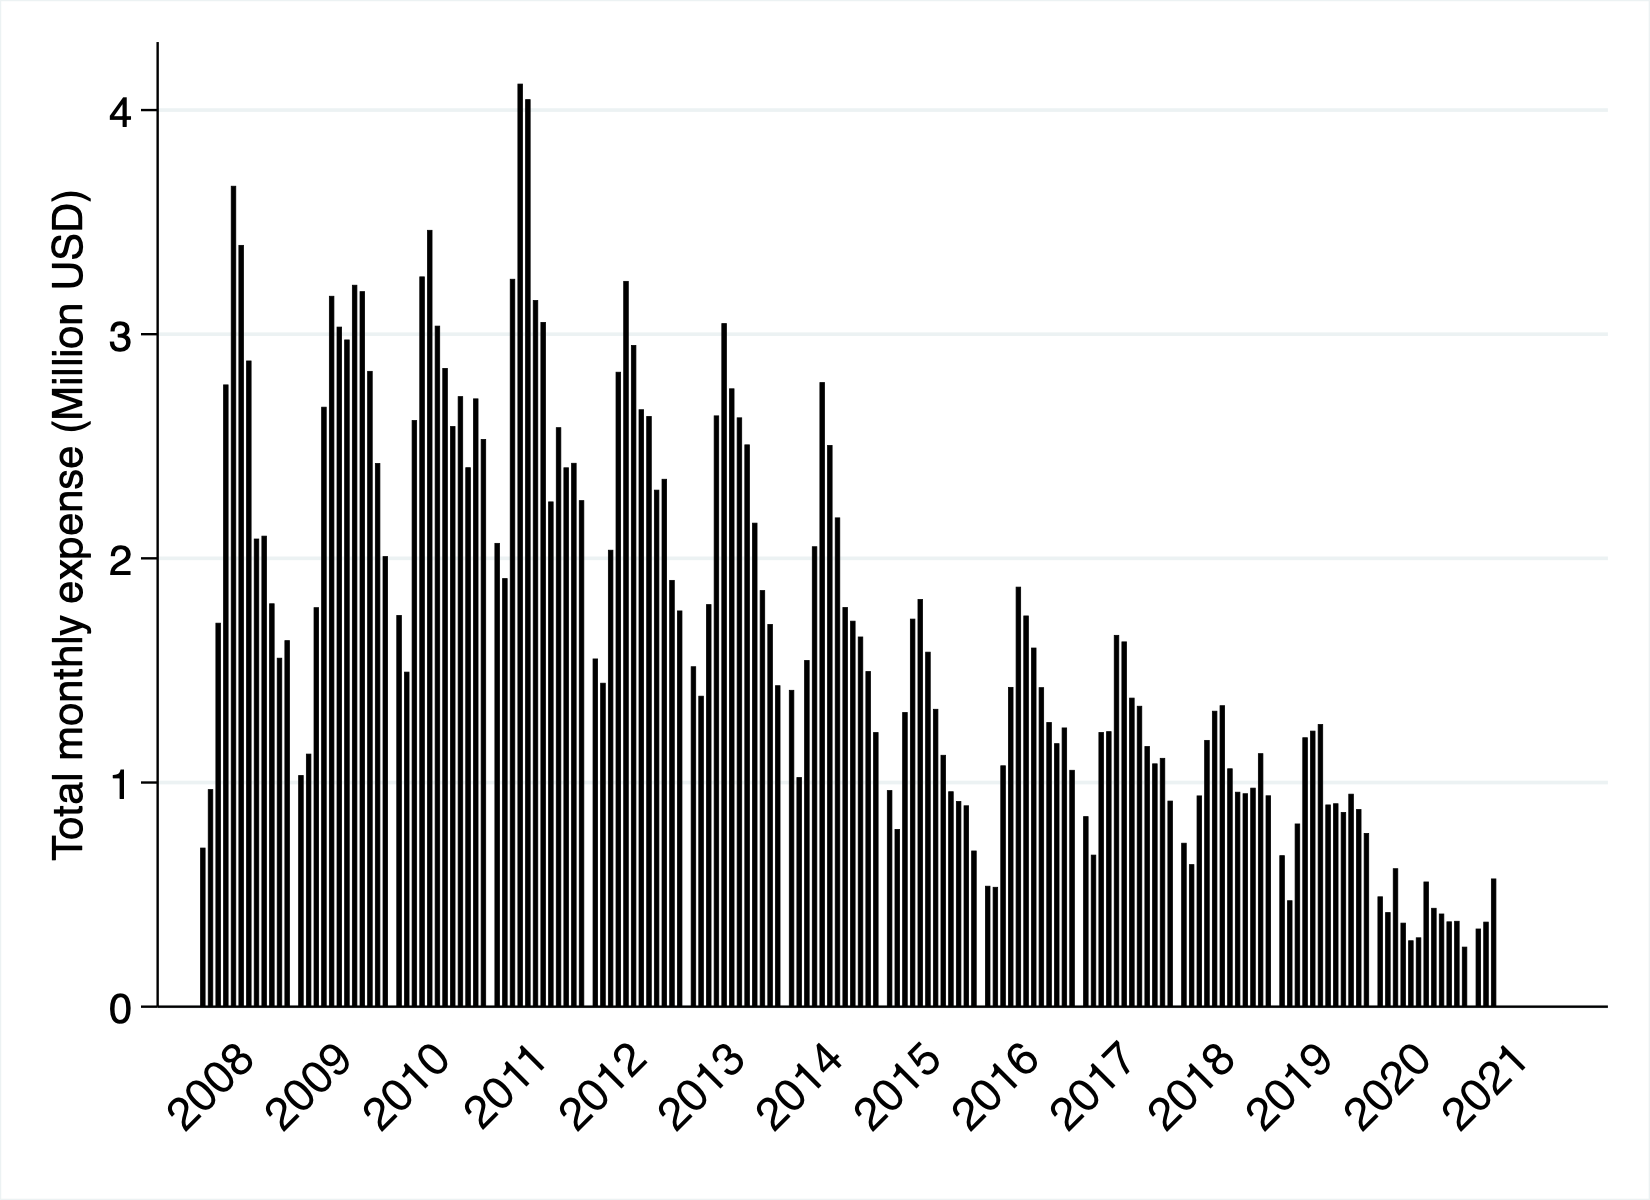


**Supplementary Figure 2 - Mean cost for each hospitalization paid by the Brazilian public health system (SUS) to hospitals for admissions of children and adolescents (< 16 years) due to respiratory infections in São Paulo State, Brazil, between January 2008 and March 2021.**


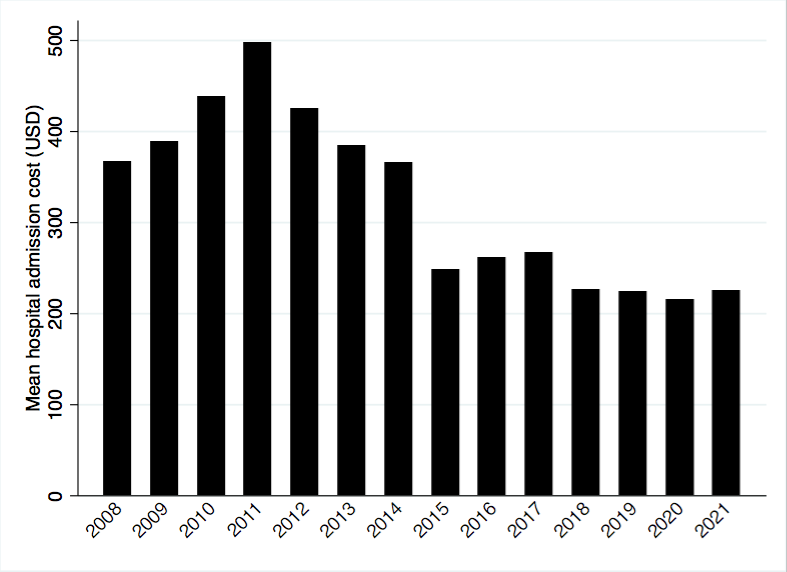

Supplement: mmc1 [file S0021755722000286:mmc1.docx]
